# Supplementary material for: Maternal Immune Cell and Cytokine Profiles to Predict Cardiovascular Risk Six Months after Preeclampsia
Source: MDPI journal article supplement (doi:10.3390/jcm11144185), 2022-07-19
Supplement: s1 [file s1]

## Supplementary Materials

**Table S1.** Antibody Panel.

**Figure S1.** Inter- and Intra- Assay Consistency.

**Figure S2.** Flow cytometry gating strategy.

**Table S2.** Tabular summary of quantified cell types at delivery, 3- and 6-months postpartum.

**Table S1.** Antibody Panel.

| Excitation source | Filter    | Antibody                                                     | Distributor and Catalogue No.             |
|-------------------|-----------|--------------------------------------------------------------|-------------------------------------------|
| Violet Laser      | 780/60 BP | BV786 Mouse Anti-Human CD45                                  | BD Biosciences; 563716                    |
|                   | 710/50 BP | BV711 Mouse Anti-Human CD14                                  | BD Biosciences; 563373                    |
|                   | 660/20 BP | BV650 Mouse Anti-Human CD25                                  | BD Biosciences; 563719                    |
|                   | 610/20 BP | BV605 Mouse Anti-Human CD16                                  | BD Biosciences; 563172                    |
|                   | 525/50 BP | Live/Dead® Fixable Dead Cells Stain Kit                      | Thermo Fischer Scientific; L34957; L34966 |
| Blue Laser        | 450/40 BP | V450 Mouse Anti-Human CD3                                    | BD Biosciences; 560365                    |
|                   | 710/50 BP | BB700 Mouse Anti-Human CD11b                                 | BD Biosciences; 742210                    |
|                   | 530/30 BP | Alexa Fluor® 488 Mouse anti-Human FoxP3                      | BD Biosciences; 560047                    |
| Y-G Laser         | 780/60 BP | CD4 Monoclonal Antibody (RPA-T4), PE-Cyanine7, eBio-science™ | Thermo Fischer Scientific; 25-0049-42     |
|                   | 710/50 BP | CD4 Mooclonal Antibody (S3.5), PE-Cyanine5.5, Invitrogen     | Thermo Fischer Scientific; MHCD0418       |
|                   | 610/20 BP | PE-CF594 Mouse Anti-Human HLA-DR                             | BD Biosciences; 562304                    |
|                   | 586/15 BP | PE Mouse Anti-Human CD56                                     | BD Biosciences; 555516                    |
| Red Laser         | 780/60 BP | APC-Cy™7 Mouse Anti-Human CD19                               | BD Biosciences; 561743, 557791            |
|                   | 670/14 BP | APC Mouse Anti-Human CD69                                    | BD Biosciences; 555533                    |
| UV Laser          | 379/28 BP | BUV395 Mouse Anti-Human CD8                                  | BD Biosciences; 563795                    |
|                   | 515/30 BP | BUV496 Mouse Anti-Human CD8                                  | BD Biosciences; 612942                    |

**Figure S1.** Inter- and Intra- Assay Consistency.

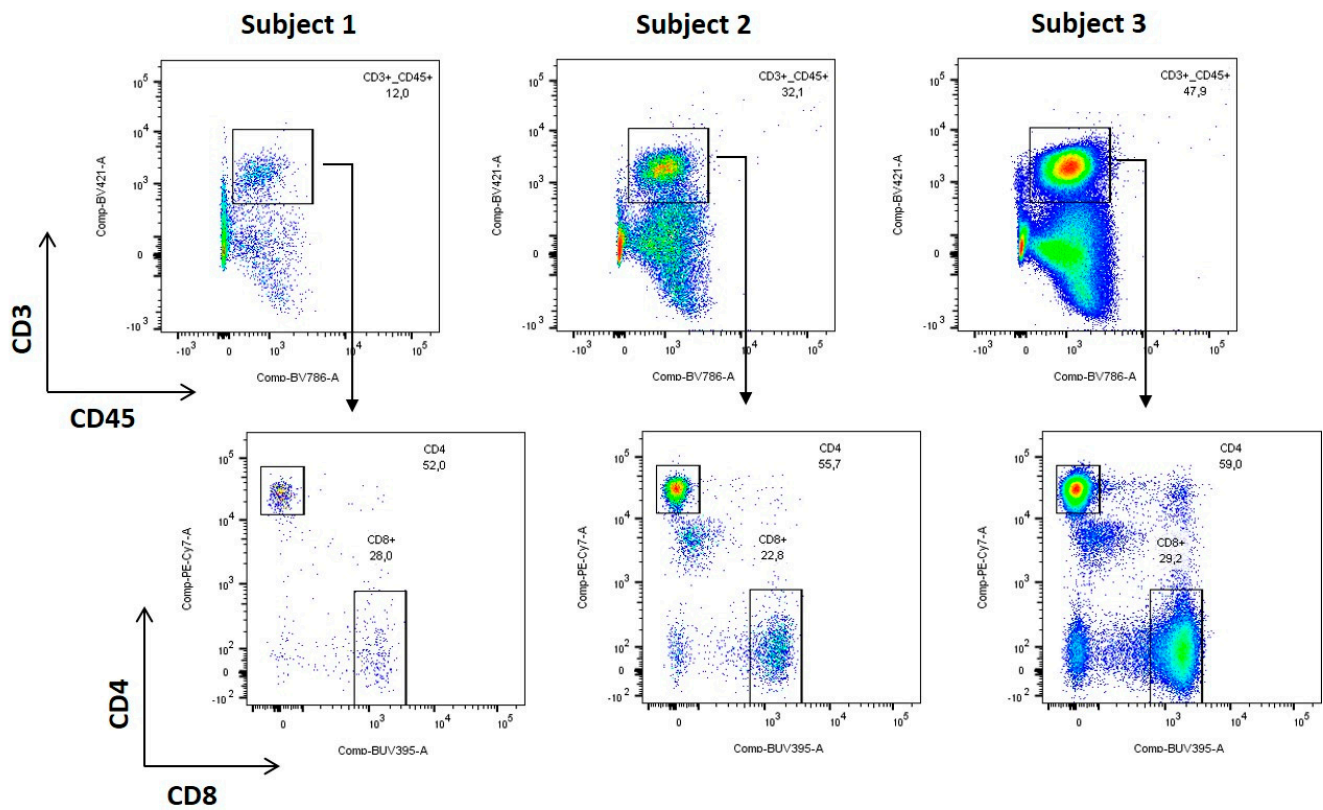

The final FACS panel showed very good consistency with gating for major immune cell populations within and between samples tested on the same day, as well as between different acquisition days. Inter-assay consistency is shown in the Figure below. Intra-assay consistency testing was similar (data not shown). Similar results were seen across all cell populations.

**Figure S2.** Flow cytometry gating strategy.

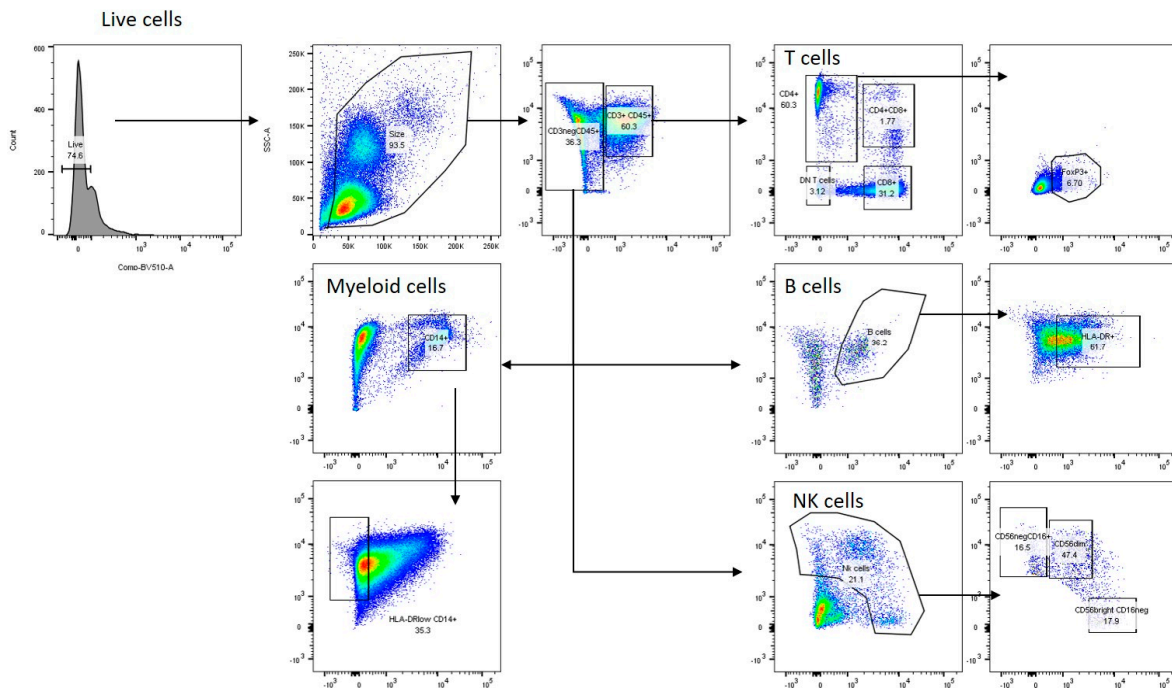

A traditional gating strategy was used to identify T cells, B cells, NK cells and Myeloid cells. A traditional gating strategy was also used to identify CD25+ and CD69+ activated T cells (figure/data not shown).

**Table S2.** Tabular summary of quantified cell types at delivery, 3- and 6-months postpartum.

| Cell type                                                                | Percentage Cell Populations <sup>a</sup> , Mean $\pm$ Standard Deviation |                     |                 |                                          |                    |                 |                                          |                     |                 |
|--------------------------------------------------------------------------|--------------------------------------------------------------------------|---------------------|-----------------|------------------------------------------|--------------------|-----------------|------------------------------------------|---------------------|-----------------|
|                                                                          | At Delivery, <i>n</i> = 15                                               |                     |                 | At 3 Months Postpartum,<br><i>n</i> = 16 |                    |                 | At 6 Months Postpartum,<br><i>n</i> = 28 |                     |                 |
|                                                                          | Low Risk<br>N = 5                                                        | High Risk<br>N = 10 | <i>p</i> -Value | Low Risk<br>N = 7                        | High Risk<br>N = 9 | <i>p</i> -Value | Low Risk<br>N = 14                       | High Risk<br>N = 14 | <i>p</i> -Value |
| <i>T Cells</i>                                                           |                                                                          |                     |                 |                                          |                    |                 |                                          |                     |                 |
| CD3 <sup>+</sup> CD45 <sup>+</sup> T cells                               | 54.0 $\pm$ 8.4                                                           | 47.2 $\pm$ 13.1     | 0.316           | 54.4 $\pm$ 10.5                          | 56.9 $\pm$ 6.8     | 0.577           | 48.8 $\pm$ 9.0                           | 50.6 $\pm$ 13.4     | 0.672           |
| <sup>L</sup> CD4 <sup>+</sup> T cells                                    | 60.5 $\pm$ 12.9                                                          | 61.9 $\pm$ 11.1     | 0.839           | 64.1 $\pm$ 11.8                          | 56.5 $\pm$ 11.9    | 0.223           | 64.6 $\pm$ 12.2                          | 58.9 $\pm$ 9.2      | 0.171           |
| <sup>L</sup> FoxP3 <sup>+</sup> regulatory T cells                       | 6.9 $\pm$ 2.5                                                            | 5.6 $\pm$ 2.2       | 0.321           | 8.1 $\pm$ 1.8                            | 6.1 $\pm$ 1.1      | 0.014*          | 7.0 $\pm$ 2.6                            | 5.8 $\pm$ 1.8       | 0.192           |
| <sup>L</sup> CD8 <sup>+</sup> T cells                                    | 28.3 $\pm$ 9.9                                                           | 28.2 $\pm$ 10.5     | 0.977           | 22.1 $\pm$ 8.4                           | 33.5 $\pm$ 8.7     | 0.0204*         | 23.5 $\pm$ 9.6                           | 28.8 $\pm$ 8.5      | 0.137           |
| <sup>L</sup> CD4 <sup>+</sup> CD8 <sup>+</sup> (double positive) T cells | 1.3 $\pm$ 0.3                                                            | 1.3 $\pm$ 0.6       | 0.964           | 1.7 $\pm$ 0.6                            | 1.7 $\pm$ 0.4      | 0.843           | 1.2 $\pm$ 0.5                            | 1.4 $\pm$ 0.5       | 0.368           |
| <sup>L</sup> CD4 <sup>+</sup> CD8 <sup>-</sup> (double negative) T cells | 5.5 $\pm$ 2.6                                                            | 4.9 $\pm$ 2.8       | 0.681           | 7.3 $\pm$ 4.1                            | 4.5 $\pm$ 2.2      | 0.0920          | 6.5 $\pm$ 3.1                            | 7.0 $\pm$ 3.3       | 0.652           |
| <sup>L</sup> CD25 <sup>+</sup> activated T cells                         | 0.2 $\pm$ 0.1                                                            | 0.2 $\pm$ 0.1       | 0.838           | 0.3 $\pm$ 0.2                            | 0.3 $\pm$ 0.1      | 0.614           | 0.3 $\pm$ 0.2                            | 0.2 $\pm$ 0.1       | 0.329           |
| <sup>L</sup> CD69 <sup>+</sup> activated T cells                         | 2.8 $\pm$ 1.2                                                            | 2.5 $\pm$ 1.5       | 0.725           | 2.6 $\pm$ 1.4                            | 2.2 $\pm$ 0.5      | 0.466           | 2.3 $\pm$ 1.1                            | 1.9 $\pm$ 0.7       | 0.330           |
| CD4 <sup>+</sup> :CD8 <sup>+</sup> ratio                                 | 2.5 $\pm$ 1.2                                                            | 2.7 $\pm$ 1.5       | 0.800           | 3.3 $\pm$ 1.3                            | 1.9 $\pm$ 0.9      | 0.0243*         | 3.4 $\pm$ 1.9                            | 2.3 $\pm$ 0.9       | 0.0595          |
| <i>Non-T Cell Lymphocytes and myeloid cells</i>                          |                                                                          |                     |                 |                                          |                    |                 |                                          |                     |                 |
| CD3-CD45 <sup>+</sup> N                                                  | 42.3 $\pm$ 8.2                                                           | 48.1 $\pm$ 12.6     | 0.367           | 41.4 $\pm$ 9.4                           | 40.5 $\pm$ 6.5     | 0.813           | 46.9 $\pm$ 8.7                           | 43.1 $\pm$ 10.1     | 0.298           |
| <sup>L</sup> CD19 <sup>+</sup> B cells                                   | 6.0 $\pm$ 3.5                                                            | 7.2 $\pm$ 3.7       | 0.560           | 7.2 $\pm$ 2.9                            | 7.8 $\pm$ 2.4      | 0.615           | 9.5 $\pm$ 9.0                            | 8.4 $\pm$ 3.1       | 0.657           |
| <sup>L</sup> HLA-DR <sup>+</sup> B cells                                 | 44.7 $\pm$ 25.7                                                          | 41.3 $\pm$ 15.1     | 0.749           | 61.9 $\pm$ 19.8                          | 74.1 $\pm$ 8.3     | 0.115           | 61.2 $\pm$ 16.8                          | 62.2 $\pm$ 10.5     | 0.854           |
| <sup>L</sup> CD3-CD45 <sup>+</sup> NK cells                              | 15.2 $\pm$ 5.5                                                           | 8.7 $\pm$ 5.1       | 0.0401 *        | 13.9 $\pm$ 9.1                           | 23.2 $\pm$ 10.3    | 0.0813          | 15.8 $\pm$ 11.2                          | 13.9 $\pm$ 7.3      | 0.598           |
| <sup>L</sup> CD56 <sup>bright</sup> CD16 <sup>-</sup> NK cells           | 11.3 $\pm$ 8.4                                                           | 20.6 $\pm$ 24.6     | 0.432           | 12.0 $\pm$ 8.0                           | 8.9 $\pm$ 6.9      | 0.426           | 12.9 $\pm$ 11.5                          | 10.9 $\pm$ 12.8     | 0.663           |
| <sup>L</sup> CD56 <sup>dim</sup> NK cells                                | 50.4 $\pm$ 5.0                                                           | 38.4 $\pm$ 19.0     | 0.194           | 48.2 $\pm$ 11.0                          | 43.6 $\pm$ 15.0    | 0.507           | 42.6 $\pm$ 12.4                          | 38.6 $\pm$ 15.1     | 0.449           |
| <sup>L</sup> CD56-CD16 <sup>+</sup> NK cells                             | 25.1 $\pm$ 9.2                                                           | 28.7 $\pm$ 14.0     | 0.610           | 26.3 $\pm$ 9.0                           | 37.1 $\pm$ 12.1    | 0.0683          | 29.7 $\pm$ 12.4                          | 38.3 $\pm$ 17.6     | 0.149           |
| <sup>L</sup> CD14 <sup>+</sup> myeloid cells                             | 18.9 $\pm$ 8.9                                                           | 17.5 $\pm$ 11.4     | 0.809           | 16.0 $\pm$ 10.0                          | 15.0 $\pm$ 4.0     | 0.771           | 11.2 $\pm$ 7.6                           | 9.4 $\pm$ 6.0       | 0.495           |
| <sup>L</sup> CD11b <sup>+</sup> monocytes                                | 94.2 $\pm$ 2.4                                                           | 94.2 $\pm$ 3.0      | 0.985           | 89.2 $\pm$ 11.0                          | 95.2 $\pm$ 1.3     | 0.123           | 91.5 $\pm$ 6.4                           | 89.5 $\pm$ 8.6      | 0.495           |
| <sup>L</sup> HLA DR <sup>+</sup> monocytes                               | 6.5 $\pm$ 4.7                                                            | 7.5 $\pm$ 7.7       | 0.803           | 8.9 $\pm$ 4.9                            | 10.5 $\pm$ 3.0     | 0.420           | 6.3 $\pm$ 4.2                            | 5.2 $\pm$ 4.1       | 0.490           |

\* *p* < 0.05. <sup>a</sup> All cell populations are reported as frequency within the parent cell populations, except for CD3-CD45<sup>+</sup>/CD19<sup>+</sup> B cells which are reported as the frequency within the grandparent population (See gating strategy detailed in the supplementary materials for reference)
